# Supplementary material
Source: PubMed Central journal article supplement (PMC3668485)
Supplement: supp_blood-2012-08-449215_blood-2012-08-449215-1.pdf [file supp_blood-2012-08-449215_blood-2012-08-449215-1.pdf]

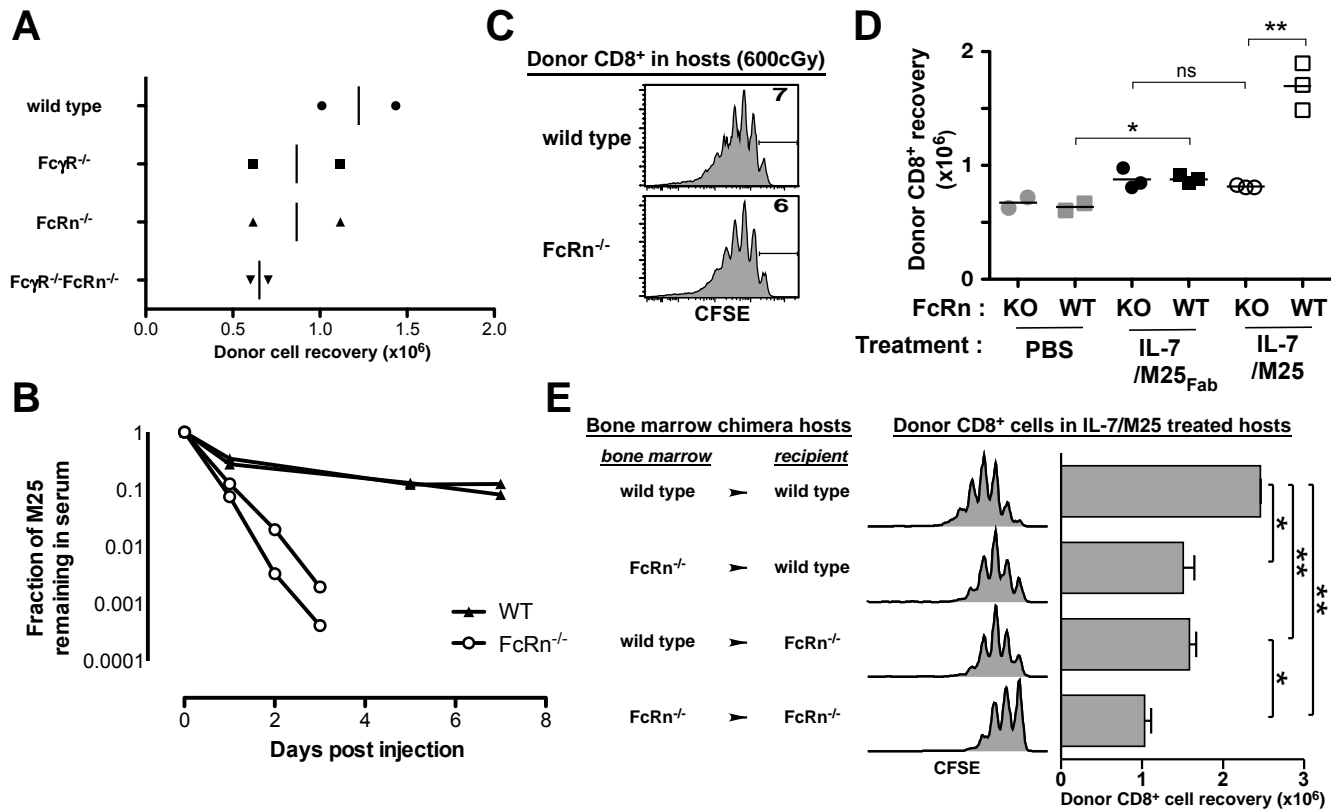

**Supplemental Figure 1. The potency of IL-7/M25 depends on host expression of FcRn.** (A) Donor cell recoveries from the experiment as described in Figure 2A. (B) Wild type and FcRn<sup>-/-</sup> mice were injected with 200μl PBS containing 25μg biotin-conjugated M25 and 5μg IL-7 via the tail vein. Within 5mins of injection, and every day for the following 7 days, mice were anesthetized by isoflurane inhalation, 80-100μL of blood was drawn from the retroorbital plexus and separated serum was stored at -20°C for simultaneous analysis of all samples. Biotinylated M25 content of serially diluted serum samples was determined by ELISA, using rat anti-mouse IgG (Jackson ImmunoResearch) capture and detection by streptavidin-conjugated horseradish peroxidase. Shown are the biotin-M25 contents normalized to the T=5mins value for each individual mouse from one such experiment. (C) 3x10<sup>6</sup> CFSE-labeled B6.CD45.1<sup>+</sup> LN cells were adoptively transferred to irradiated (600 cGy) CD45.2<sup>+</sup> hosts as indicated. The CFSE profiles of CD45.1<sup>+</sup> CD8<sup>+</sup> lymphocytes at d7 are shown here. (D) CD8<sup>+</sup> cells were purified from B6.CD45.1<sup>+</sup> donor LN, CFSE-labeled and 3.5x10<sup>6</sup> transferred to each CD45.2<sup>+</sup> host, either FcRn<sup>-/-</sup> (circles) or wild type (squares), on d0. Hosts received *i.p.* injections every other day of PBS alone or 1.5μg rhIL-7 plus either M25 (7.5μg) or M25<sub>Fab</sub> (7.5μg equivalent). The d7 recoveries of CD45.1<sup>+</sup> CD8<sup>+</sup> cells from host LN and spleen are presented with horizontal bars indicating the average of 2-3 separately analyzed mice per group. (E) 10<sup>7</sup> bone marrow cells isolated from the hind long bones and pelvis of wild type (CD45.1<sup>+</sup>) or FcRn<sup>-/-</sup> (CD45.2<sup>+</sup>) mice and were injected *i.v.* into recipients of the same or reciprocal genotype that had been lethally irradiated (1050cGy) one day earlier. Bone marrow chimeras were rested 7 weeks prior to the transfer (*i.v.*) of 1.5x10<sup>6</sup> purified and CFSE-labeled CD90.1<sup>+</sup> CD8<sup>+</sup> LN cells on d0, followed by *i.p.* injections of PBS or rhIL-7/M25 (3.75μg/22.5μg) on d1, 3, 5 and analysis on d7. Depicted here are the CFSE profiles of CD8<sup>+</sup> CD90.1<sup>+</sup> cells from host LN (middle) as well as the average recoveries of CD8<sup>+</sup> CD90.1<sup>+</sup> cells from host LN and spleen, error bars indicate SEM (N=4). Data are representative of 2-3 experiments. \*P<.05, \*\*P<.005 and ns indicates not significant

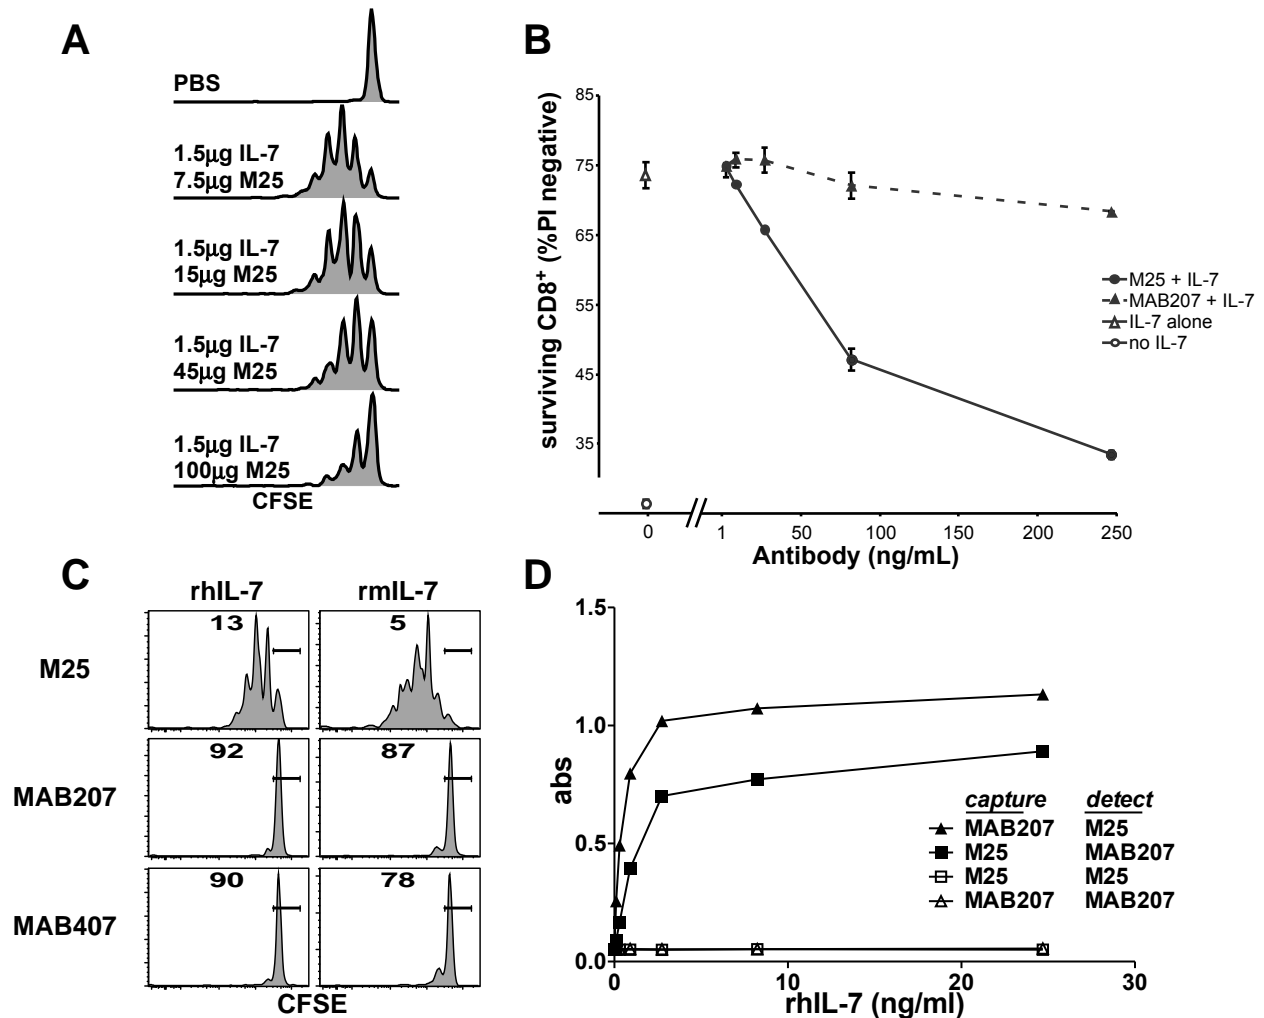

**Supplemental Figure 2. M25 blocks the effect of IL-7 *in vivo* and *in vitro* and M25, but not other IL-7 binding mAb, form IL-7/mAb complexes with potent *in vivo* activity.** (A)  $5 \times 10^6$  CFSE-labeled B6.CD45.1<sup>+</sup> LN cells were adoptively transferred to B6.CD45.2<sup>+</sup> hosts on d0. Injections of PBS alone or rhIL-7 (1.5 $\mu$ g) with M25 (7.5, 15, 45, or 100 $\mu$ g) were administered *i.p.* on d1, 3, and 5. Shown are the CFSE profiles of CD45.1<sup>+</sup> CD8<sup>+</sup> cells from host LN on d7. (B)  $4.5 \times 10^5$  wild type LN cells were cultured at 37°C in RPMI complete media (○), media supplemented with 1ng/mL rhIL-7 alone (△), or media supplemented with 1ng/mL rhIL-7 and indicated concentrations of mAbs M25 (●) or MAB207 (▲). After 48hrs in culture, samples were stained for CD4, CD8 and live cells (propidium iodide negative) and analyzed by flow cytometry. Error bars indicate SD (N=2). (C)  $2 \times 10^6$  CFSE labeled B6.CD90.1<sup>+</sup> LN cells were injected *i.v.* into B6.CD90.2<sup>+</sup> hosts. On d1, 3, and 5, host mice received *i.p.* injections of 1.5 $\mu$ g IL-7 + 7.5 $\mu$ g mAb, as indicated, and donor cell proliferation in host LN and spleen was analyzed on d7. CFSE histograms shown here are gated on CD90.1<sup>+</sup> CD8<sup>+</sup> lymphocytes. (D) ELISA of titrated concentrations of rhIL-7 using capture mAbs and biotin-conjugated detection mAbs as shown followed by streptavidin-HRP (Jackson ImmunoResearch) and developed with 1-Step™ Ultra TMB-ELISA (Thermo Scientific) according to manufacturers instructions. Shown are the absorbance at 450nm for duplicate samples +/- SEM. Data are representative of 2-3 experiments.
